# Supplementary material for: A transgenic male-only strain of the New World screwworm for an improved control program using the sterile insect technique
Source: PubMed Central journal article supplement (PMC5004303; doi:10.1186/s12915-016-0296-8), 2016-08-30

**A**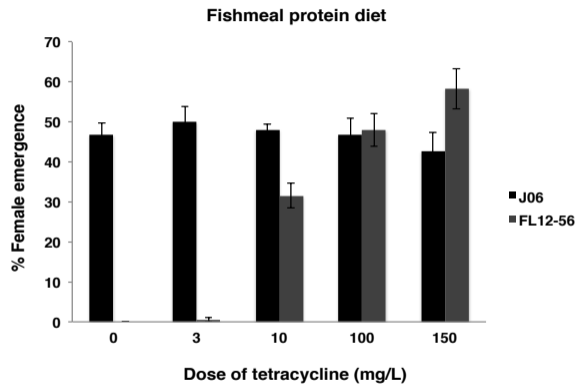**B**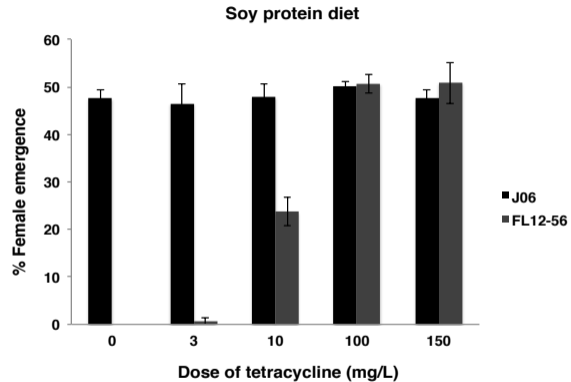

Supplement: 12915_2016_296_MOESM3_ESM.pdf [file 12915_2016_296_MOESM3_ESM.pdf]
